# Supplementary material for: Targeting inflammasome/IL-1 pathways for cancer immunotherapy
Source: PubMed Central journal article supplement (PMC5082376; doi:10.1038/srep36107), 2016-10-27
Supplement: srep36107-s1.pdf [file srep36107-s1.pdf]

Supplementary Information for

**Targeting inflammasome/IL-1 pathways for cancer immunotherapy**

Beichu Guo<sup>1,2,\*</sup>, Shunjun Fu<sup>1</sup>, Jinyu Zhang<sup>1</sup>, Bei Liu<sup>1,2</sup>, Zihai Li<sup>1,2</sup>

1 Department of Microbiology and Immunology, 2 Hollings Cancer Center, Medical University of South Carolina (MUSC), Charleston, South Carolina 29425-5040. United States of America.



**Supplemental Figure S1. Inflammasome activation in tumor microenvironments.** Western Blot analysis of tumor tissues from WT, NLRP3 KO and caspase-1 KO mice injected orthotopically with EO771 tumor cells. Tumor tissues were harvested, homogenized, and analyzed by Western Blot with anti-IL-1 $\beta$  or anti-caspase-1 antibodies for caspase 1 and IL-1 $\beta$  processing.



**Supplemental Figure S2. IL-1 $\beta$  induces CCL2 expression in macrophages and tumor cells.** RT-PCR analysis of CCL2 expression in macrophage cell line RAW 264.7 and breast cancer cell line EO771 treated with IL-1 $\beta$ .
